# Supplementary material for: General cluster sorption isotherm: surface area determination
Source: Royal Society of Chemistry journal article supplement (doi:10.1039/d2cp02293a), 2022-01-01
Supplement: d2cp02293a2.pdf [file d2cp02293a2.pdf]

## Supporting Information for

General Cluster Sorption Isotherm: Surface area determination

Christoph Buttersack

Institute of Chemical Technology, Leipzig University, Linnéstr. 3, 04103 Leipzig, Germany

Appeared in: **Physical Chemistry Chemical Physics** (2022)

### Content

Table S1 and S2: Direct transformation of 1- to 2-dimensional GCSI

Figure S1: 1-and 2-dim GCSI: N<sub>2</sub> sorption on macroporous SH-functionalized silica

Figure S2: 1-and 2-dim GCSI: N<sub>2</sub> sorption on macroporous octadimethyl-functionalized silica

Figure S3: 1-and 2-dim GCSI: N<sub>2</sub> sorption on macroporous alumina

Figure S4: 1-and 2-dim GCSI: Ar sorption on macroporous silica

Figure S5: 1-and 2-dim GCSI: H<sub>2</sub>O sorption on macroporous silica

Figure S6: 1-and 2-dim GCSI: neo-pentane sorption on macroporous silica

Figure S7: 1-and 2-dim GCSI: n-pentane sorption on macroporous silica

Figure S8: Plot of  $K_n$  versus cluster size: N<sub>2</sub> on macroporous silica

Figure S9: Plot of  $K_n$  versus cluster size: N<sub>2</sub> on macroporous SH-functionalized silica

Figure S10: Plot of  $K_n$  versus cluster size: N<sub>2</sub> on macrop. octadimethyl-functionalized silica

Figure S11: Plot of  $K_n$  versus cluster size: N<sub>2</sub> on macroporous alumina

Figure S12: Plot of  $K_n$  versus cluster size: Ar on macroporous silica

Figure S13: Plot of  $K_n$  versus cluster size: H<sub>2</sub>O on macroporous silica

Figure S14: Plot of  $K_n$  versus cluster size: neo-pentane on macroporous silica

Figure S15: Plot of  $K_n$  versus cluster size: n-pentane on macroporous silica

Figure S16: Monolayer by BET, N<sub>2</sub> and Ar on silica, N<sub>2</sub> on SH-silica, N<sub>2</sub> on ODM-silica

Figure S17: Monolayer by BET, H<sub>2</sub>O, neo-pentane, and n-pentane on silica

Figure S18: Monolayer by ESW, N<sub>2</sub> and Ar on silica, N<sub>2</sub> on SH-silica, N<sub>2</sub> on ODM-silica

Figure S19: Monolayer by ESW, H<sub>2</sub>O, neo-pentane, and n-pentane on silica

Remarks to the appended program in R

**Table S1:** Direct transformation of the 1-dimensional to the 2-dimensional GCSI. Data belonging to nitrogen sorption on alumina and differently modified silica (see Table 1). Data points taken from those inside the experimental pressure range.  $Q$  in  $\text{g kg}^{-1}$

| adsorbent          | alumina             | silica SH           | silica ODM          | silica               |
|--------------------|---------------------|---------------------|---------------------|----------------------|
| temperature        | 77 K                | 77 K                | 77 K                | 77 K                 |
| data points        | 1374                | 1406                | 1344                | 1411                 |
| steepness          | 2860                | 1260                | 27                  | 10100                |
| GCSI               | 2-dim               | 2-dim               | 2-dim               | 2-dim                |
| $AICc$             | -12364              | -6800               | -8031               | -12530               |
| $R$                | 0.99996             | 0.9994              | 0.9995              | 0.99998              |
| $\ln K_1$          | 11.55 $\pm$ 0.0075  | 10.209 $\pm$ 0.032  | 6.178 $\pm$ 0.020   | 12.498 $\pm$ 0.00603 |
| $K$                | 0.9894 $\pm$ 0.0001 | 0.9541 $\pm$ 0.0009 | 0.9606 $\pm$ 0.0007 | 0.9615 $\pm$ 0.00017 |
| $a$                | 0.8142 $\pm$ 0.0043 | 3.37 $\pm$ 0.21     | 1.813 $\pm$ 0.051   | 0.7683 $\pm$ 0.00259 |
| $b$                | 0.0569 $\pm$ 0.0002 | 0.0769 $\pm$ 0.0017 | 0.0579 $\pm$ 0.0010 | 0.0737 $\pm$ 0.00035 |
| $Q_1$              | 0.2829    0.0009    | 1.059    0.017      | 0.920    0.013      | 0.9527    0.00330    |
| $Q_{m\text{GCSI}}$ | 1.63                | 3.62                | 4.87                | 4.57                 |
| Table 1:           | 1.64                | 3.64                | 4.17                | 4.60                 |

**Table S2:** Direct transformation of the 1-dimensional to the 2-dimensional GCSI. Data belonging to the sorption of argon, water, neo-pentane, and n-pentane on macroporous silica (see Table 2). Data points taken from those inside the experimental pressure range.  $Q$  in  $\text{g kg}^{-1}$

| adsorbate          | argon                 | water               | neo-pentane         | n-pentane           |
|--------------------|-----------------------|---------------------|---------------------|---------------------|
| temperature        | 87 K                  | 303 K               | 273 K               | 298 K               |
| data points        | 1305                  | 1090                | 918                 | 1032                |
| steepness          | 89.5                  | 17.1                | 5.70                | 6.25                |
| GCSI               | 2-dim                 | 2-dim               | 2-dim               | 2-dim               |
| $AICc$             | -7373                 | -7767               | -33174              | -8515               |
| $R$                | 0.9995                | 0.99995             | 1.0000000           | 0.99991             |
| $\ln K_1$          | 7.283 $\pm$ 0.020     | 3.4019 $\pm$ 0.0083 | 3.0725 $\pm$ 3E-08  | 2.8664 $\pm$ 0.0302 |
| $K$                | 0.95501 $\pm$ 0.00072 | 0.9807 $\pm$ 0.0003 | 0.9609 $\pm$ 4E-09  | 0.9827 $\pm$ 0.0031 |
| $a$                | 3.12 $\pm$ 0.16       | >6 $\pm$            | -0.0048 $\pm$ 8E-08 | >6 $\pm$            |
| $b$                | 0.0797 $\pm$ 0.00137  | 0.4628 $\pm$ 0.0056 | 0.2406 $\pm$ 2E-08  | 0.1353 $\pm$ 0.0043 |
| $Q_1$              | 1.085                 | 7.84    0.0378      | 10.95    4E-07      | 7.47    0.1939      |
| $Q_{m\text{GCSI}}$ | 4.15                  | 12.26               | 30.83               | 24.72               |
| Table 2:           | 3.93                  | 12.26               | 30.83               | 24.77               |

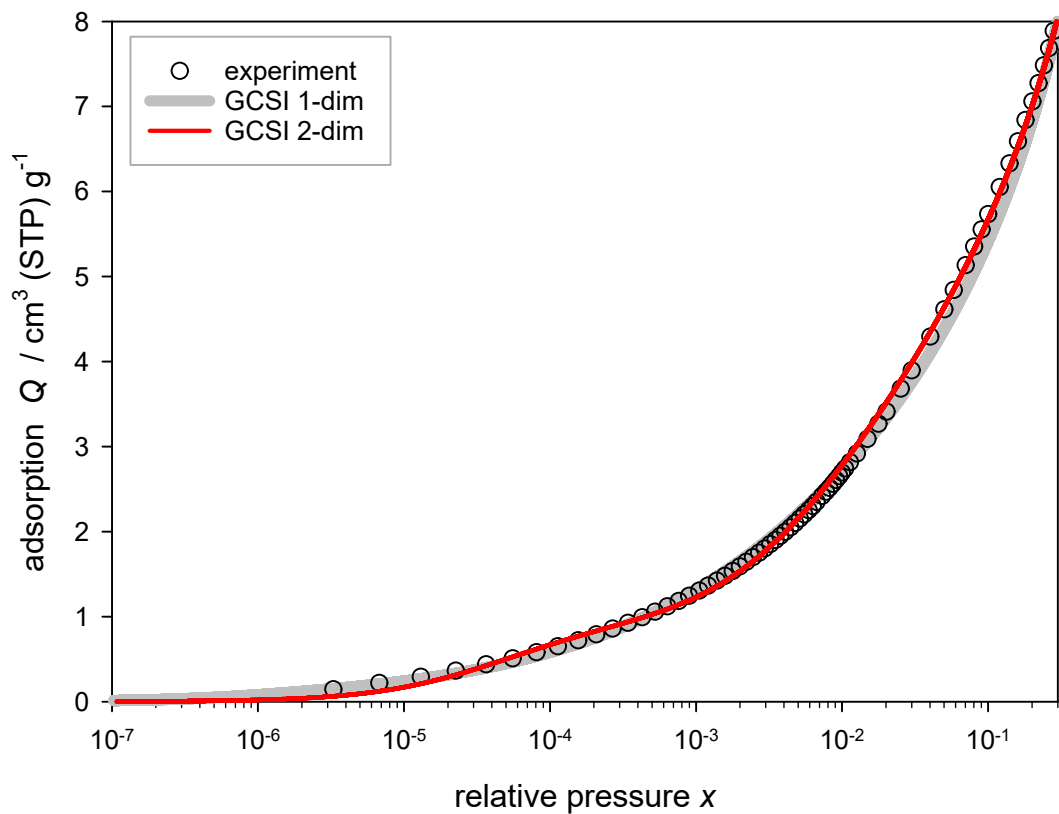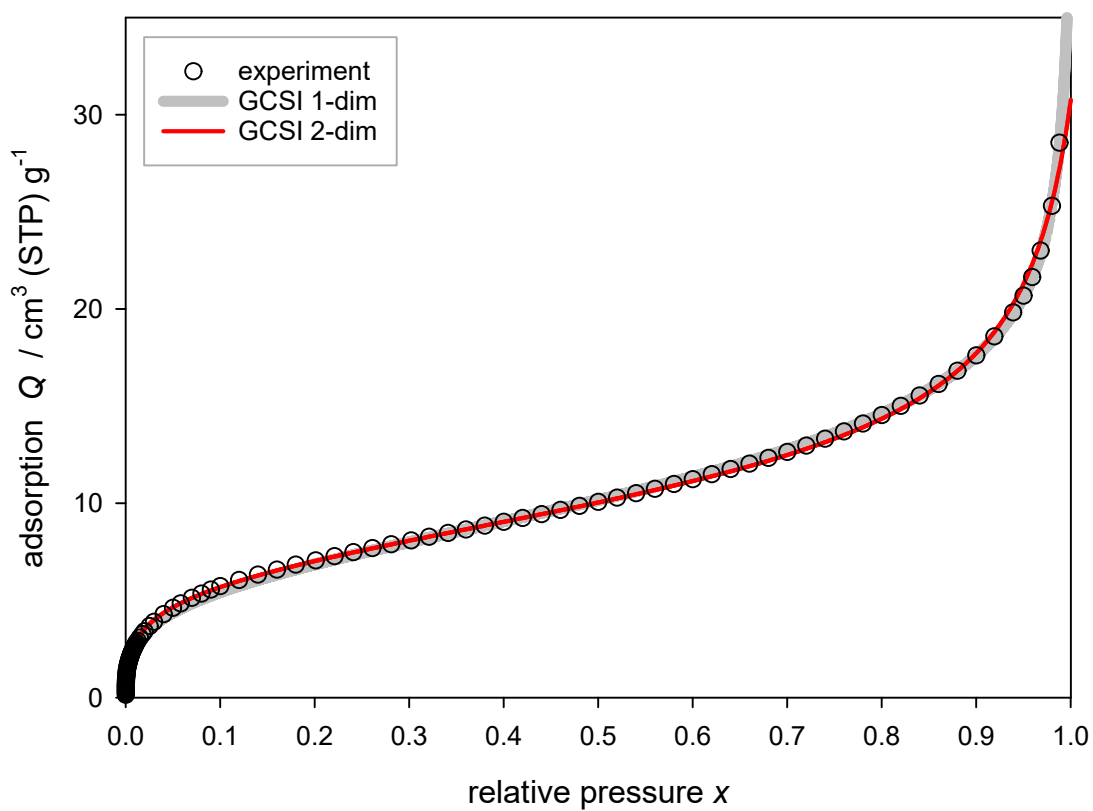

Figure S1: 1-and 2-dimensional GCSI applied to nitrogen sorption on SH functionalized macroporous silica at 77 K. Data from literature (see Table 1).

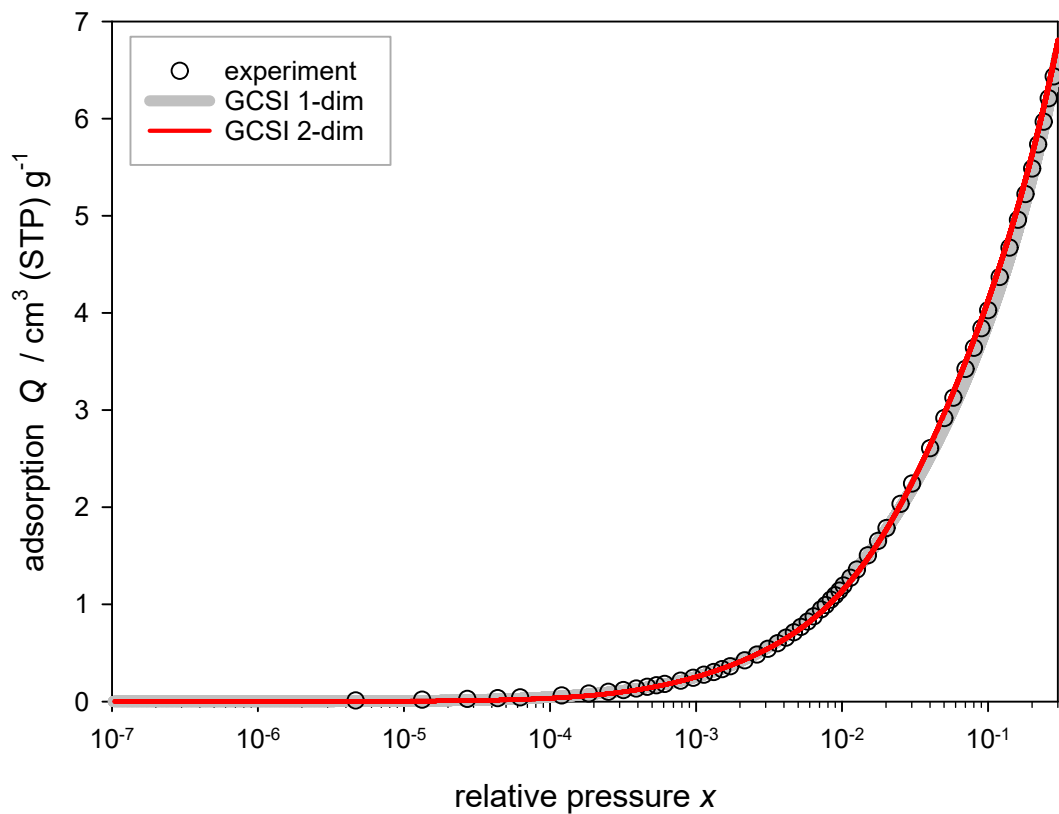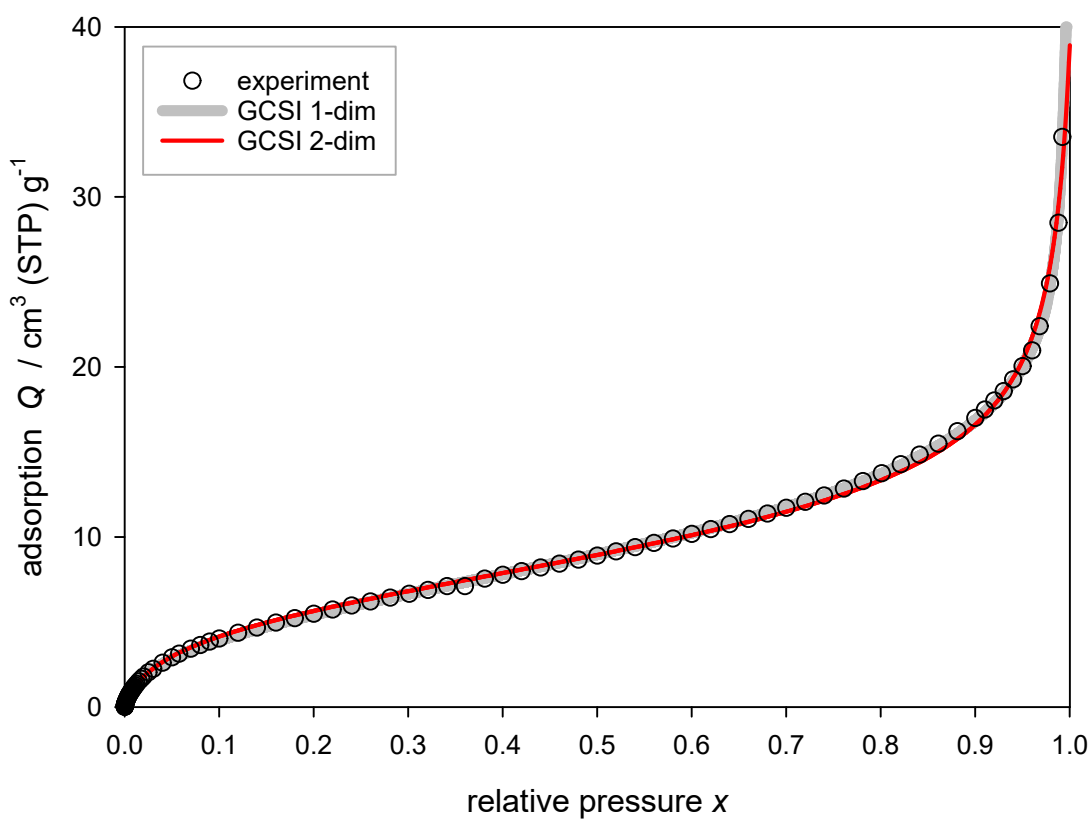

Figure S2: 1-and 2-dimensional GCSI applied to nitrogen sorption at 77 K on macroporous silica functionalized with octyldimethyl residues (ODM). Data from literature (see Table 1).

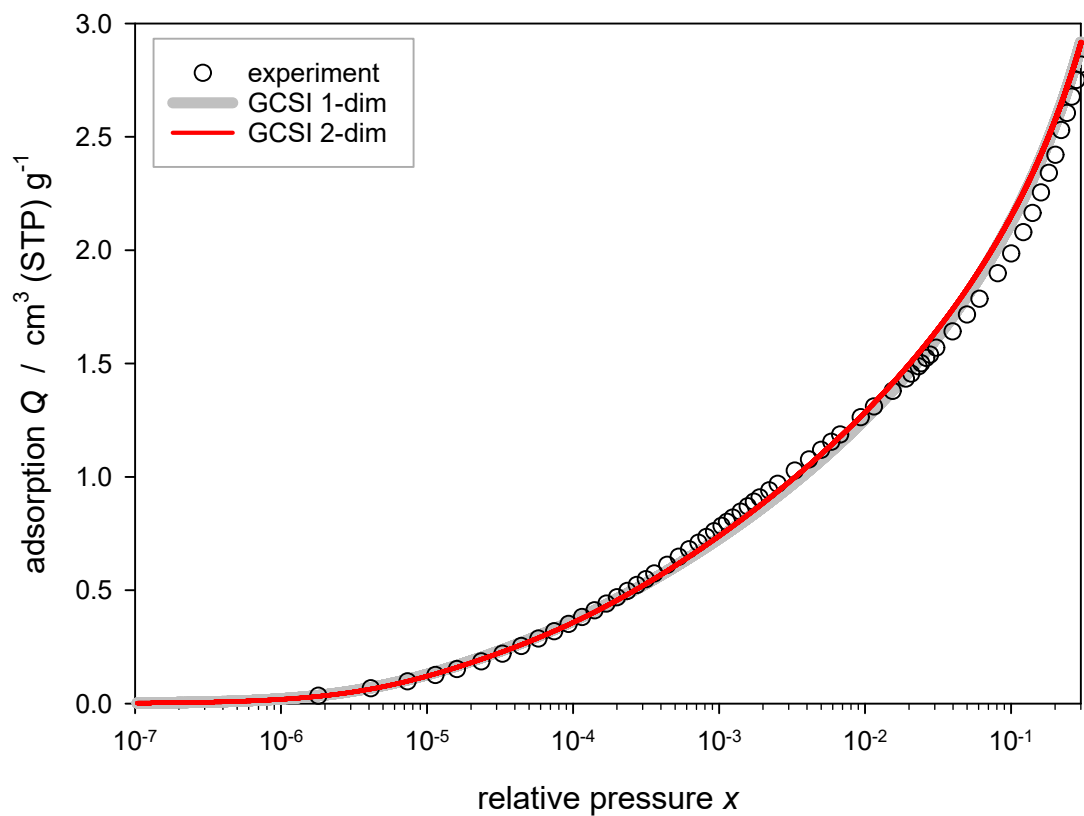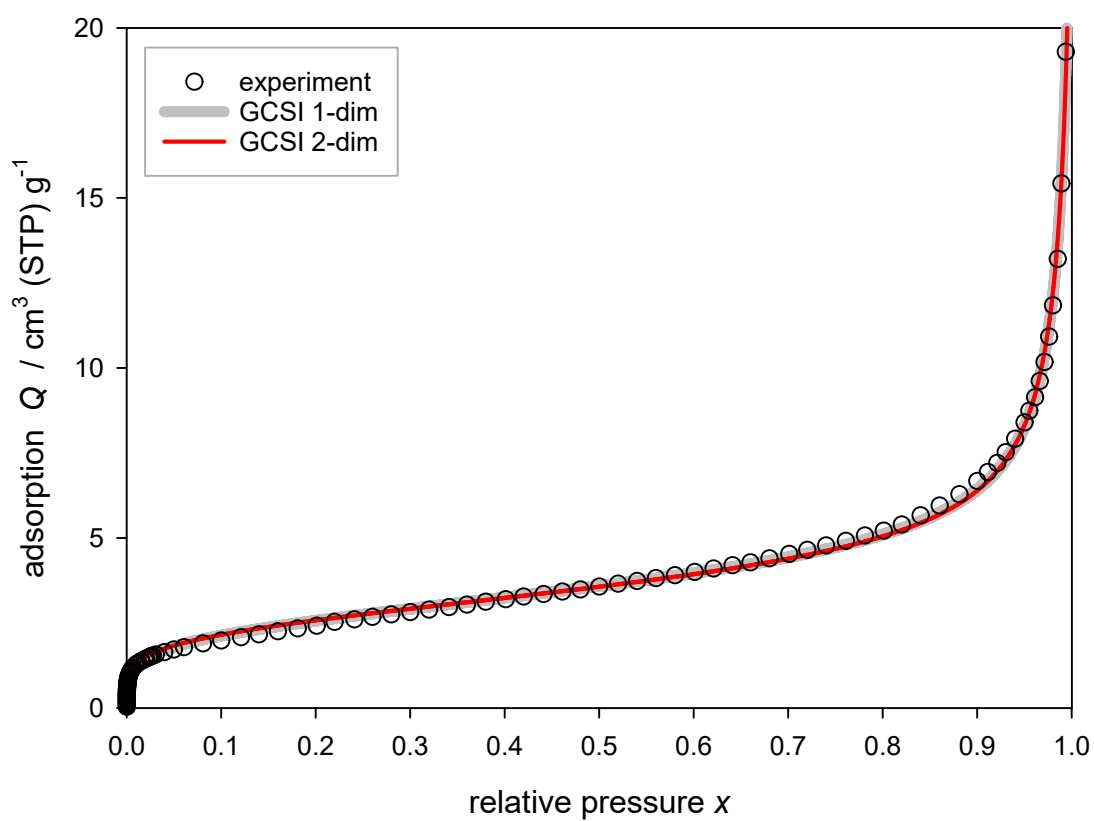

Figure S3: 1-and 2-dimensional GCSI applied to nitrogen sorption at 77 K on macroporous alumina. Data from literature (see Table 1).

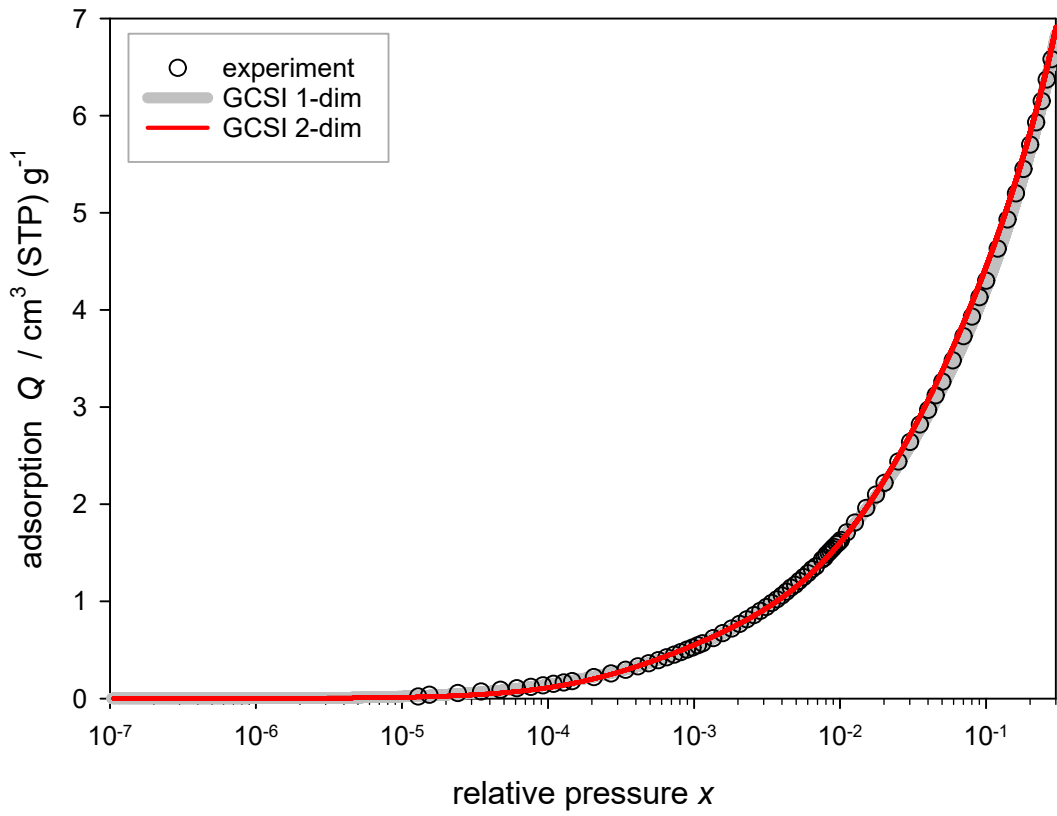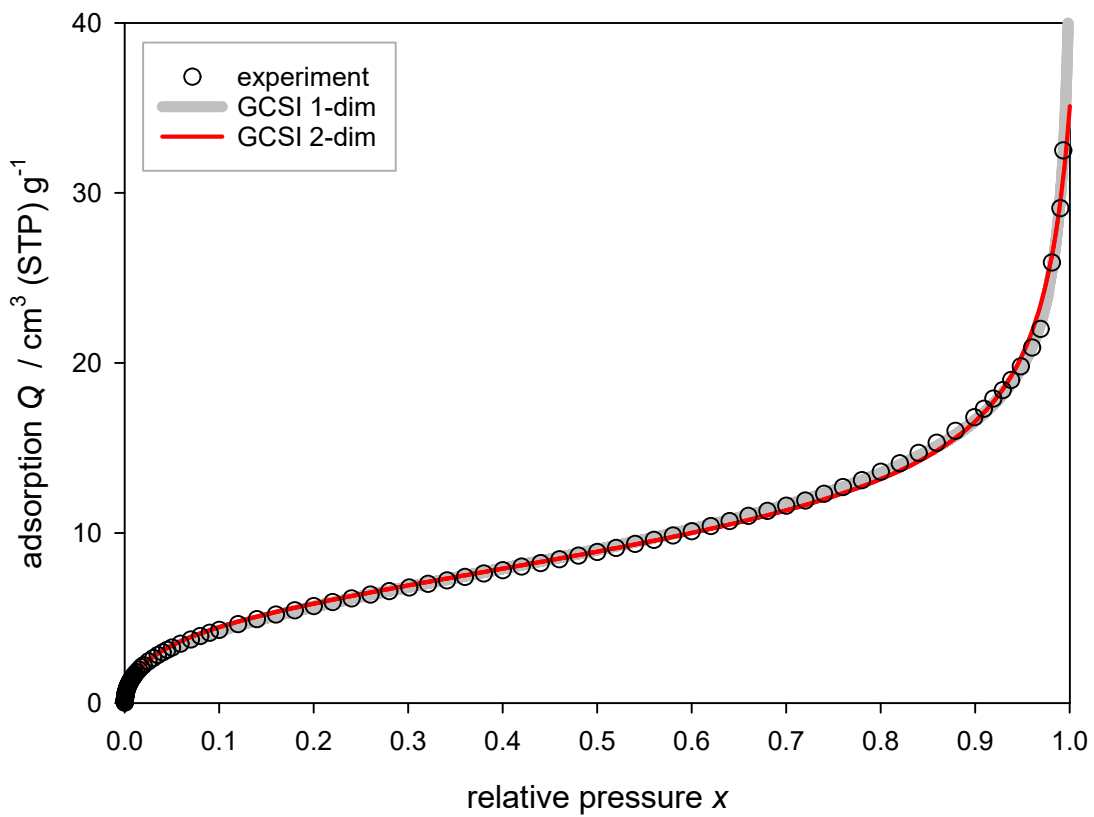

Figure S4: 1-and 2-dimensional GCSI applied on argon sorption on macroporous silica at 87 K. Data from literature (see Table 2).

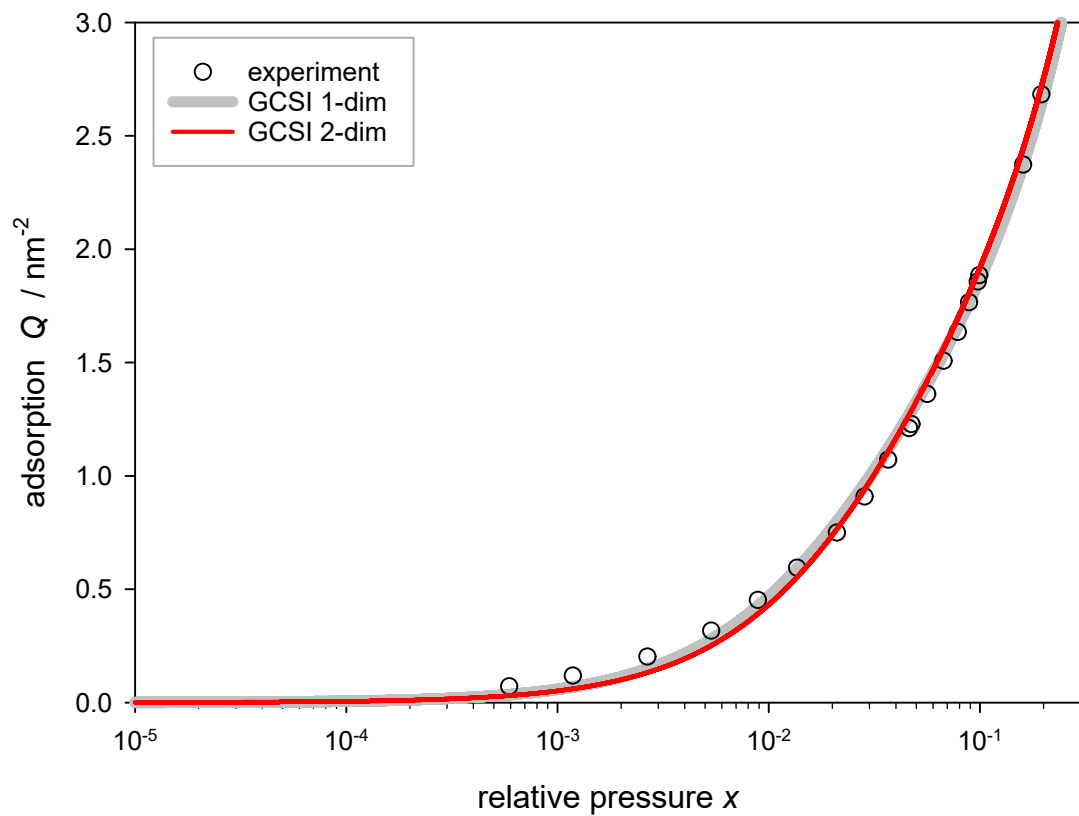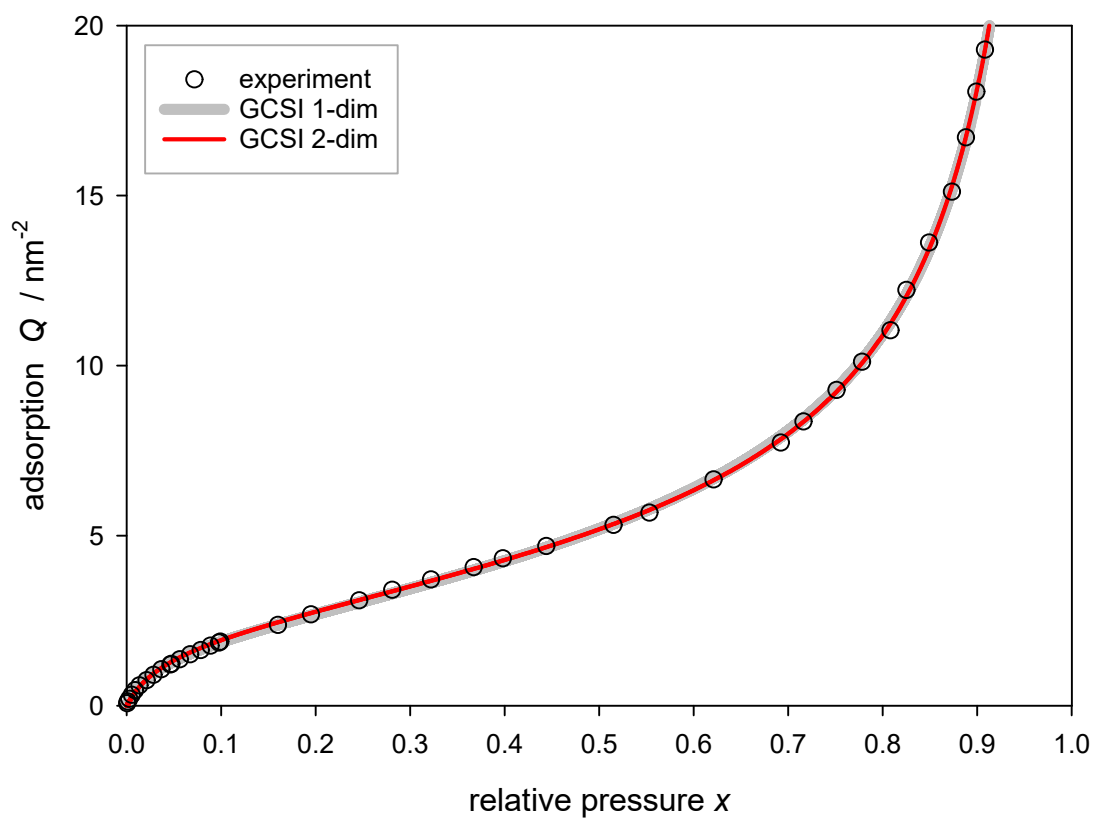

Figure S5: 1-and 2-dimensional GCSI applied on water sorption on macroporous silica at 303 K. Data from literature (see Table 2). Dimension of  $Q$ : see original literature and ref. 13.

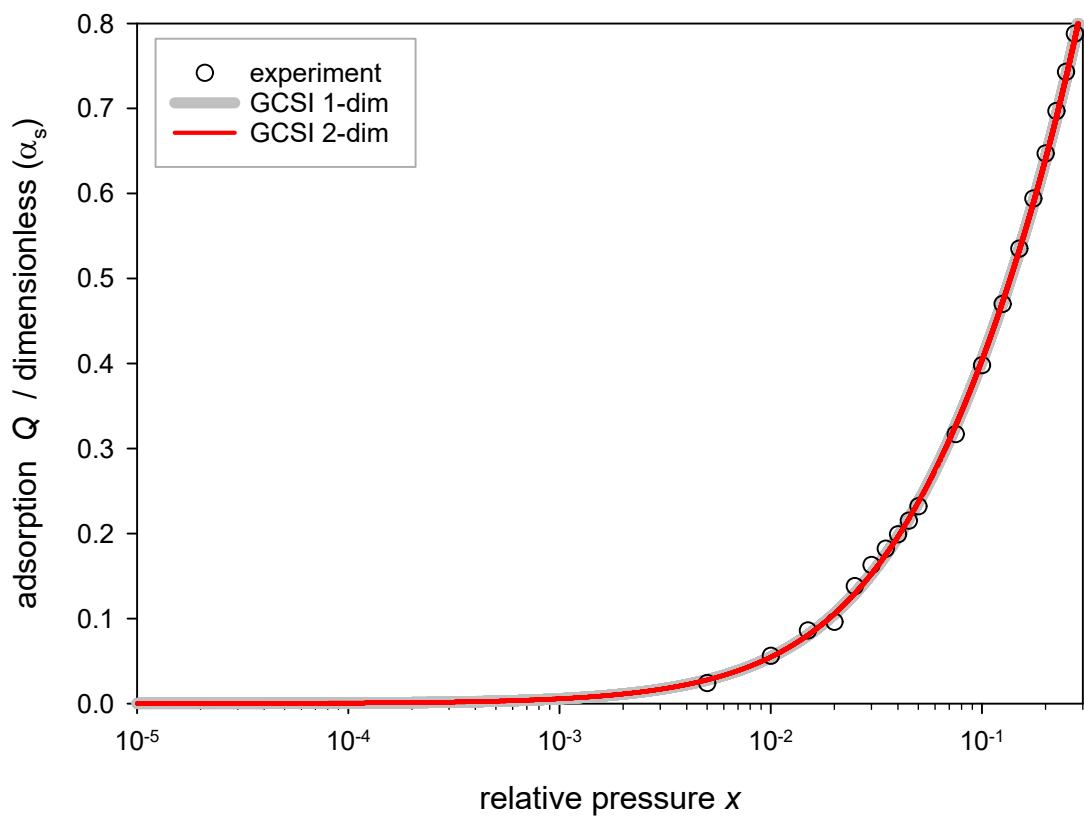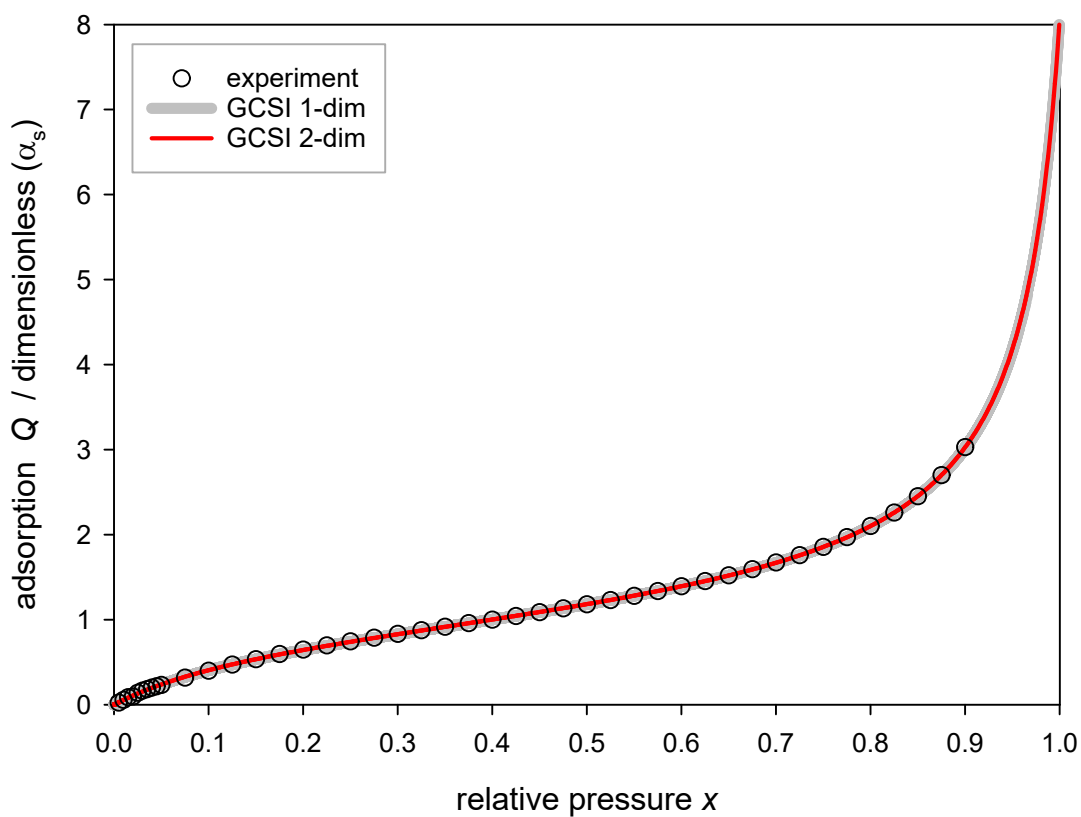

Figure S6: 1-and 2-dimensional GCSI applied on neo-pentane sorption on macroporous silica at 273 K. Data from literature (see Table 2). Dimension of  $Q$ : see original literature and ref 13.



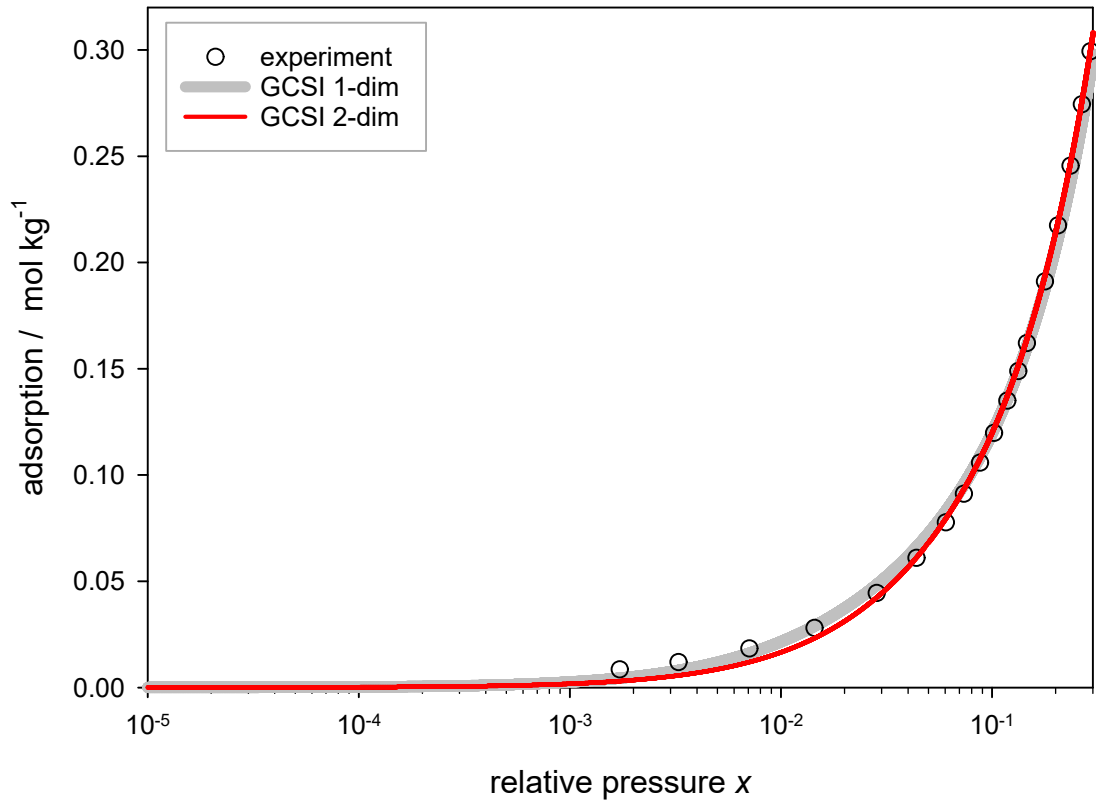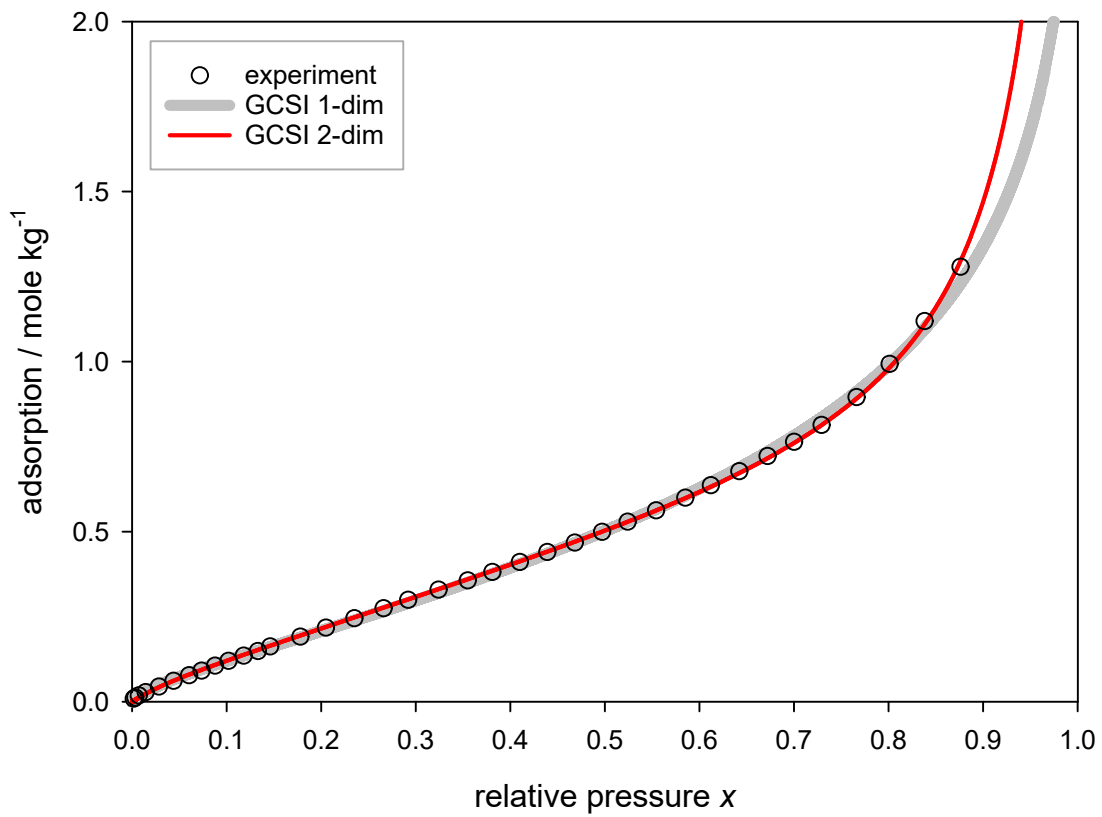

Figure S7: 1-and 2-dimensional GCSI applied on n-pentane sorption on macroporous silica at 298 K. Data from literature (see Table 2). For the 1-dimensional case  $K$  is arbitrarily set to 0.968.

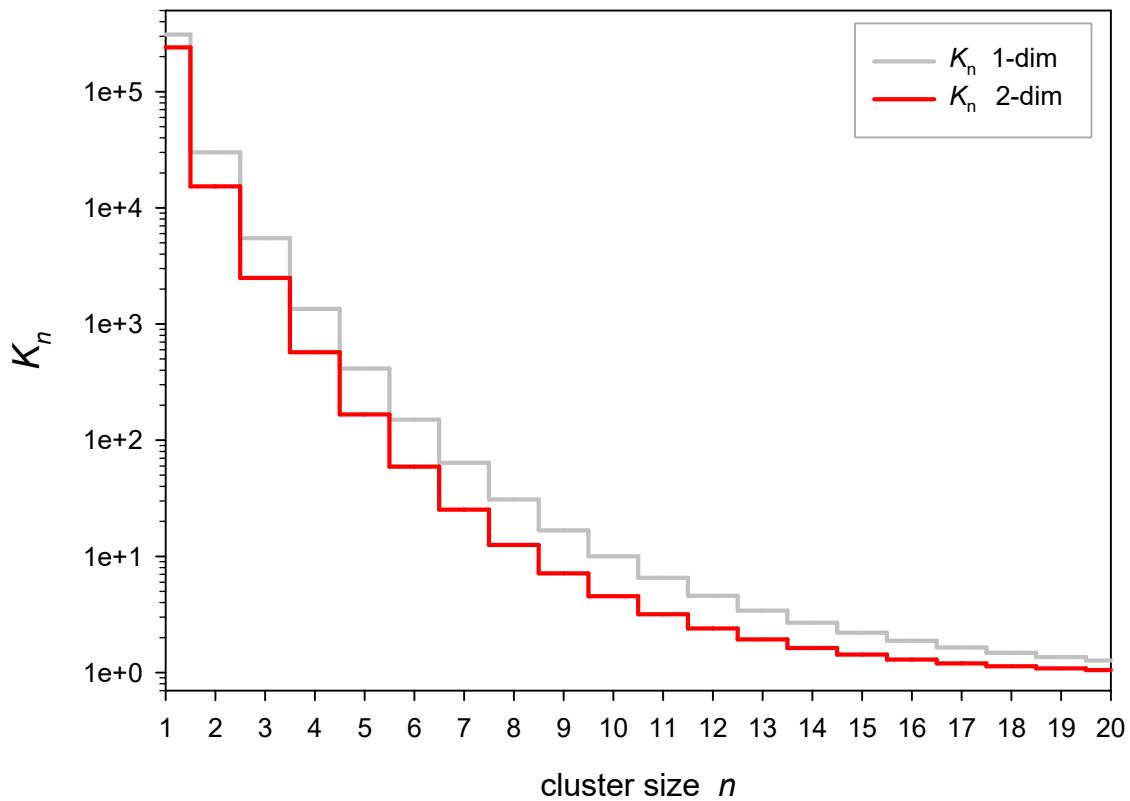

Figure S8: Plot of  $K_n$  versus cluster size for adsorption of nitrogen on macroporous silica at 77 K

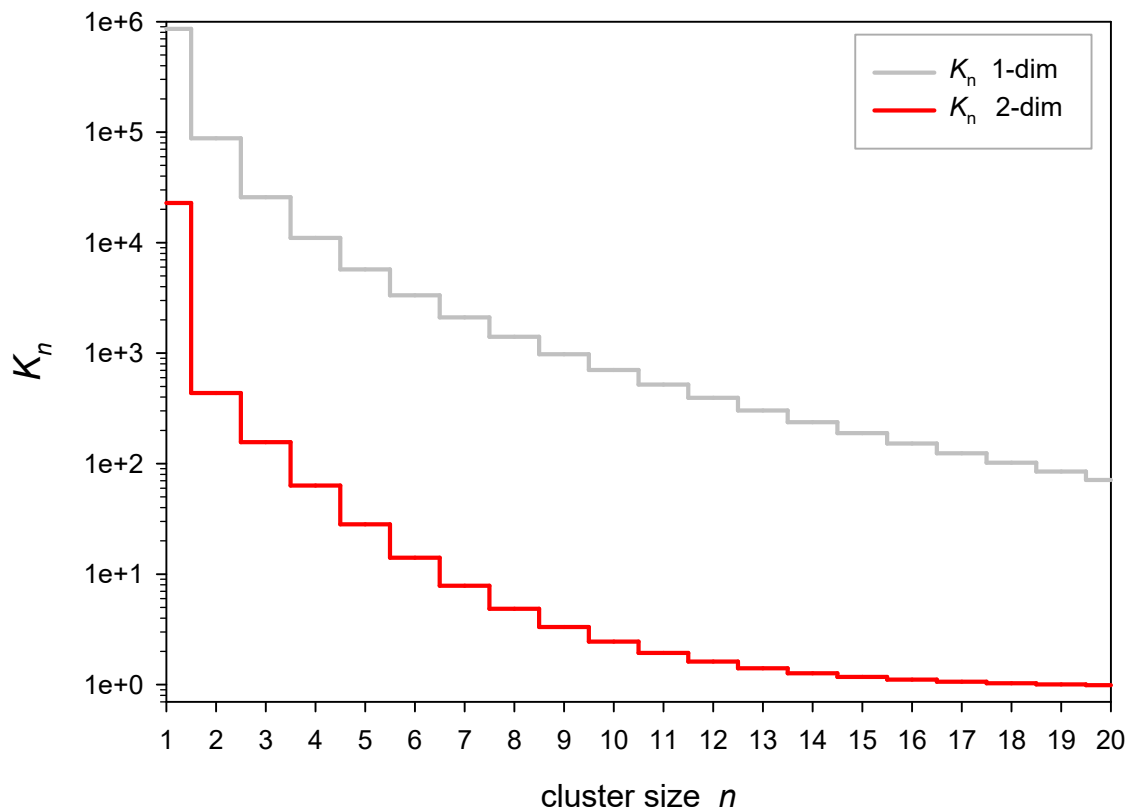

Figure S9: Plot of  $K_n$  versus cluster size for adsorption of nitrogen at 77 K on macroporous silica functionalized with SH groups.

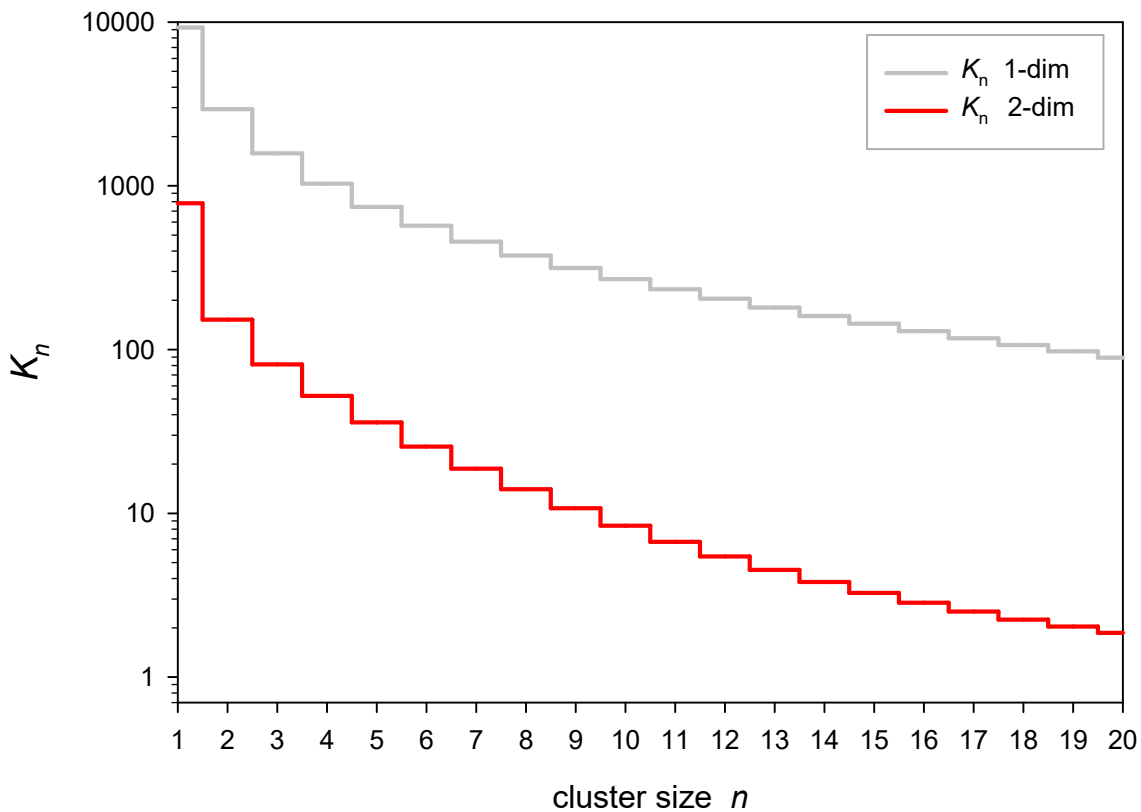

Figure S10: Plot of  $K_n$  versus cluster size for adsorption of nitrogen at 77 K on macroporous silica functionalized with octyldimethyl groups (ODM).

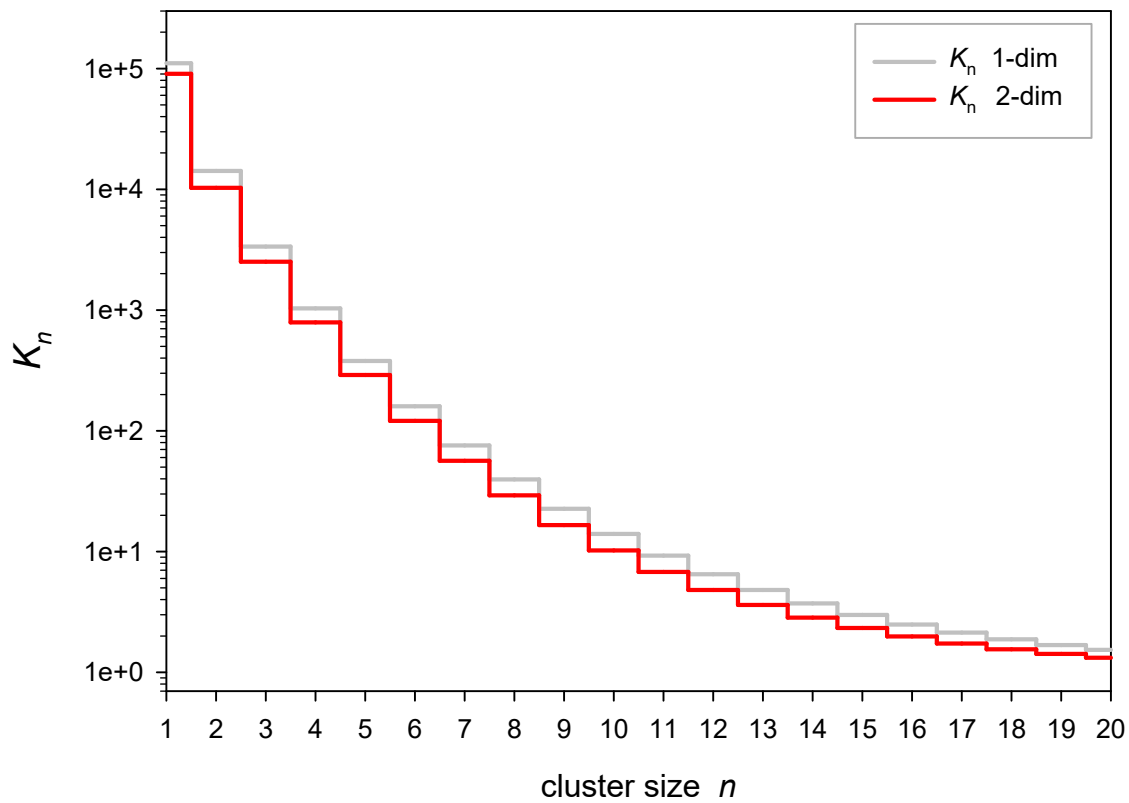

Figure S11: Plot of  $K_n$  versus cluster size for adsorption of nitrogen at 77 K on macroporous alumina.

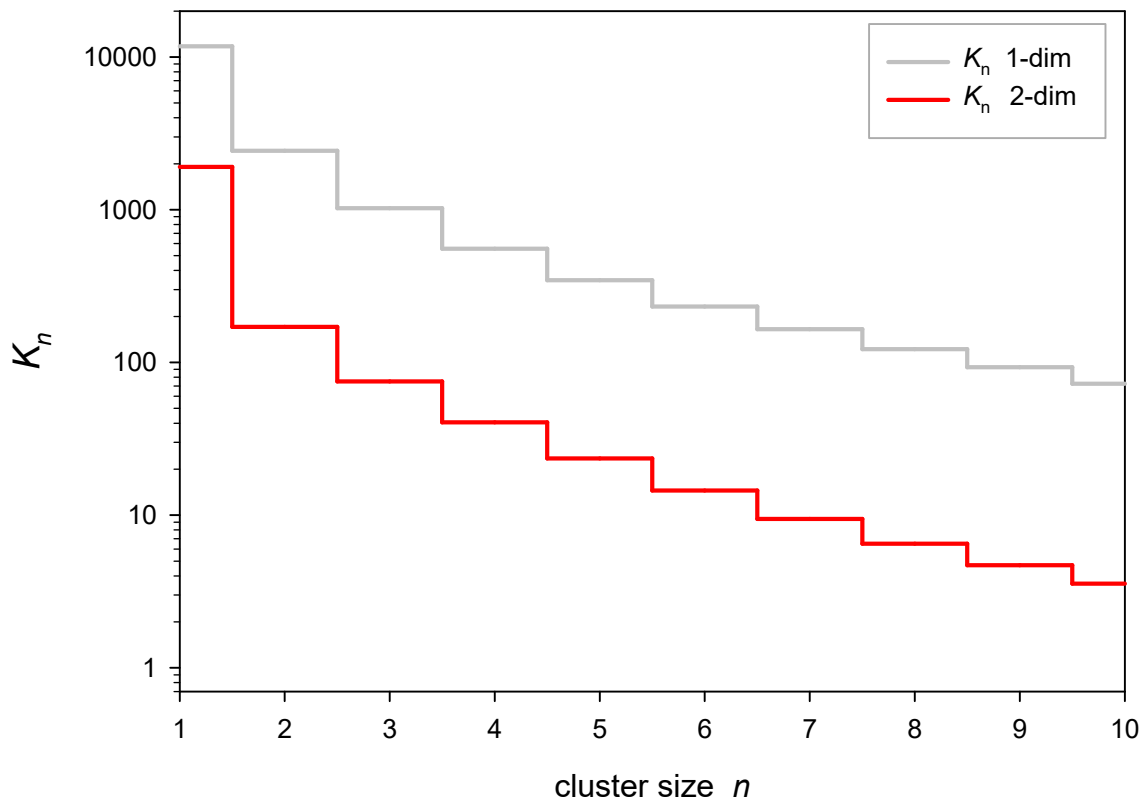

Figure S12: Plot of  $K_n$  versus cluster size for adsorption of argon at 87 K on macroporous alumina

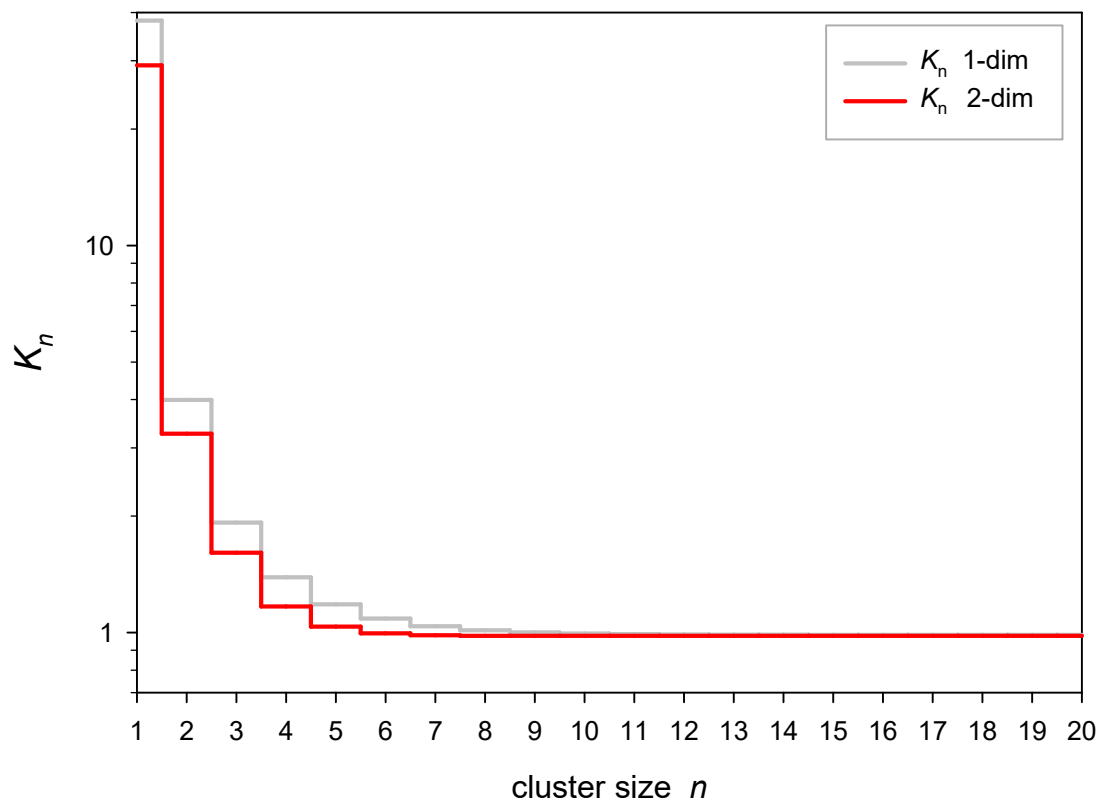

Figure S13: Plot of  $K_n$  versus cluster size for adsorption of water at 303 K on macroporous silica.

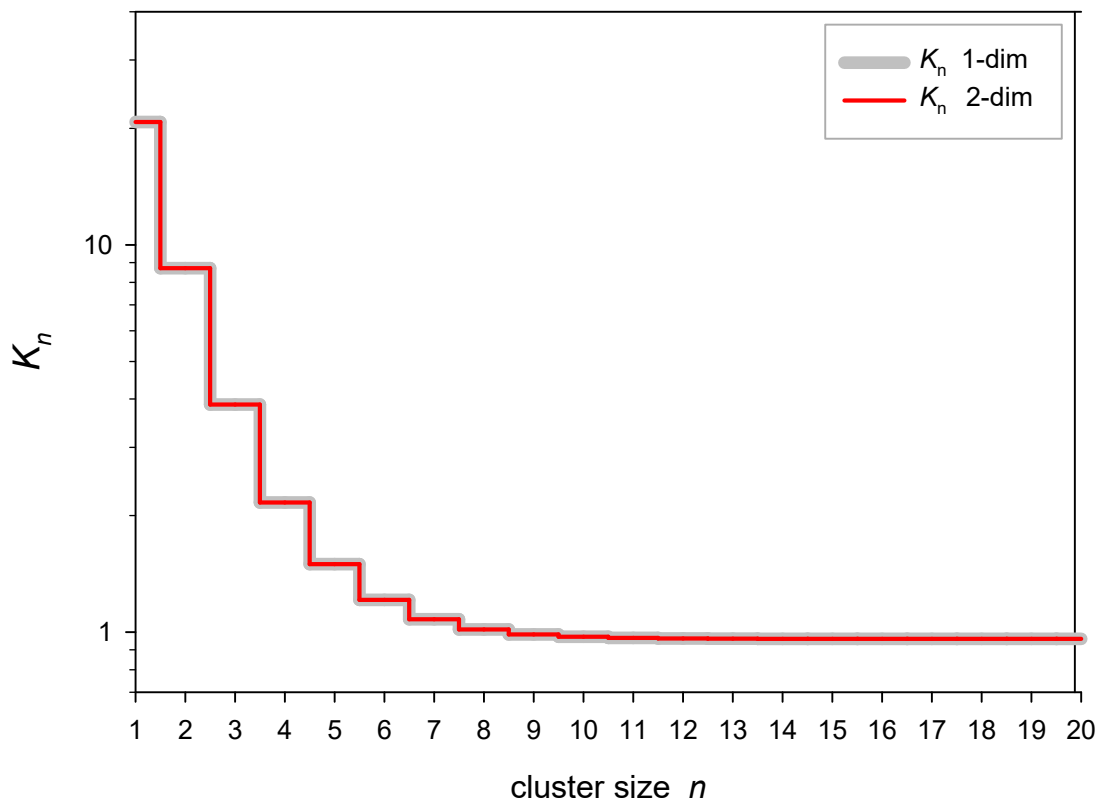

Figure S14: Plot of  $K_n$  versus cluster size for adsorption of neo-pentane at 273 K on macroporous silica.

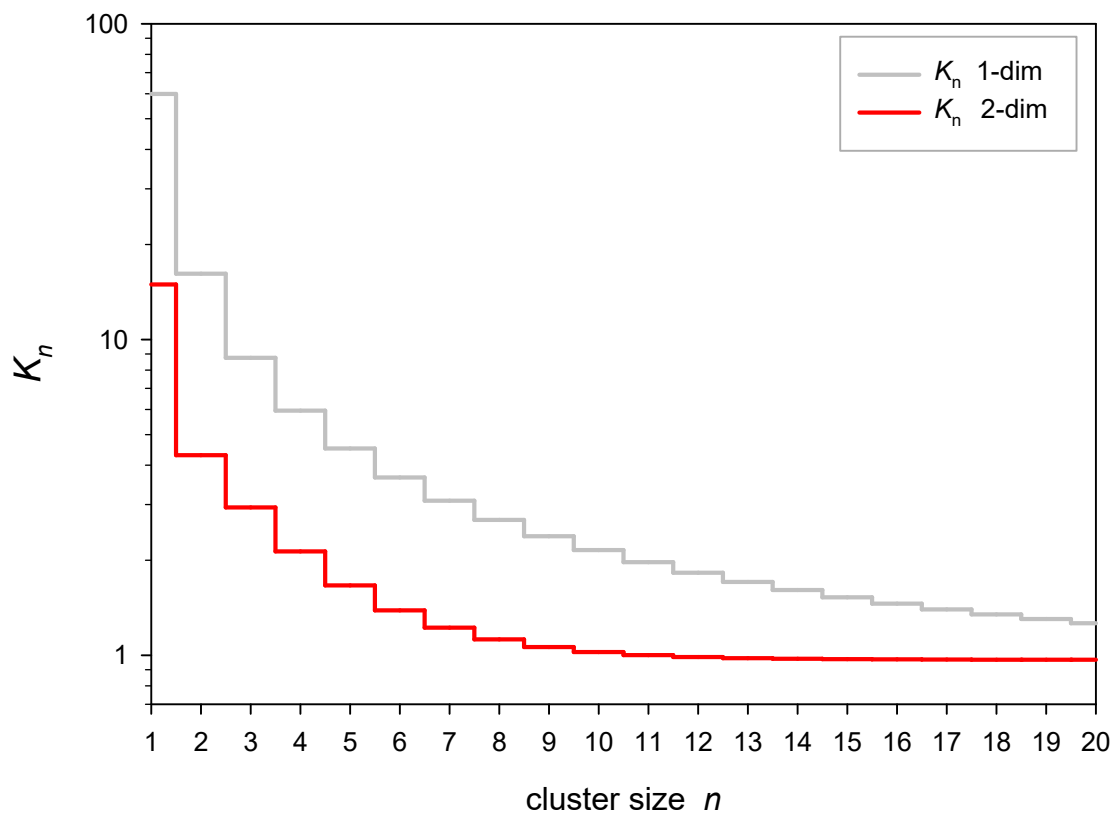

Figure S15: Plot of  $K_n$  versus cluster size for adsorption of n-pentane at 298 K on macroporous silica. For the 1-dimensional case  $K$  is arbitrarily set to 0.968.

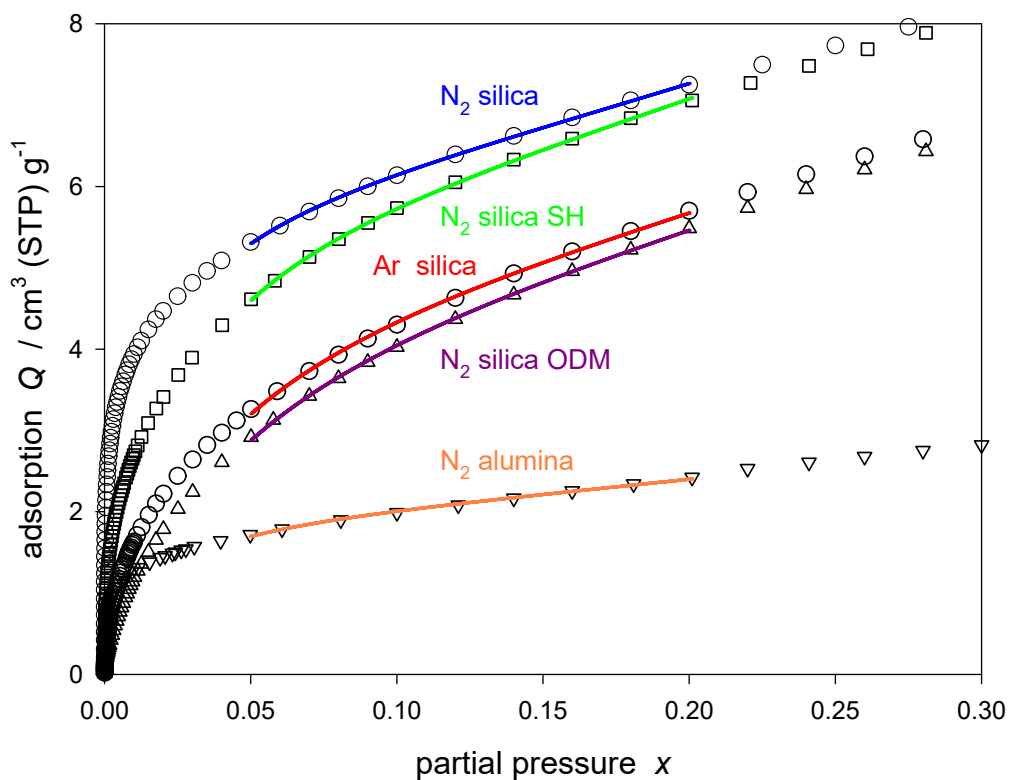

Figure S16: Monolayer detection by BET ( $0.05 < x < 0.2$ ).  $Q_{\text{BET}}$  in  $\text{cm}^3 \text{g}^{-1}$ :  
 $\text{N}_2$  silica:  $6.064 \pm 0.009$ , Ar silica:  $6.147 \pm 0.012$ ,  $\text{N}_2$  silica SH:  $6.147 \pm 0.012$ ,  $\text{N}_2$  silica ODM:  
 $5.200 \pm 0.023$ ,  $\text{N}_2$  alumina:  $2.022 \pm 0.011$

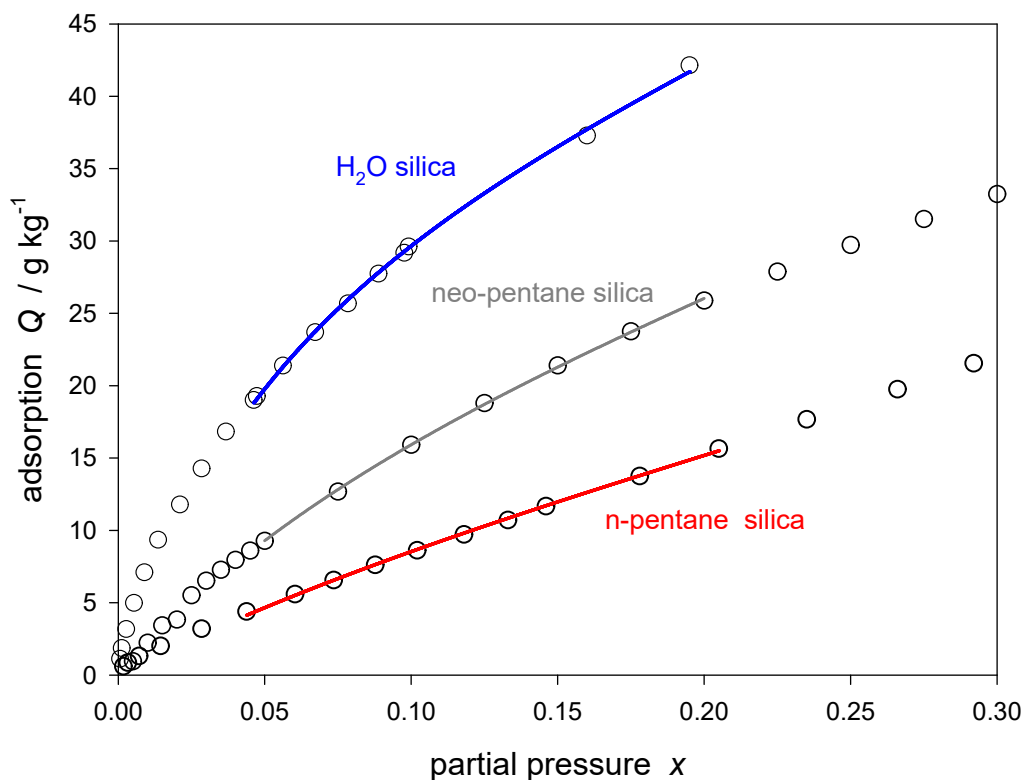

Figure S17: Monolayer detection by BET ( $0.05 < x < 0.2$ ).  $Q_{\text{BET}}$  in  $\text{g kg}^{-1}$ :  
 water silica:  $11.8 \pm 0.1$ , neo-pentane silica:  $32.7 \pm 0.4$ , n-pentane silica:  $22.7 \pm 0.5$

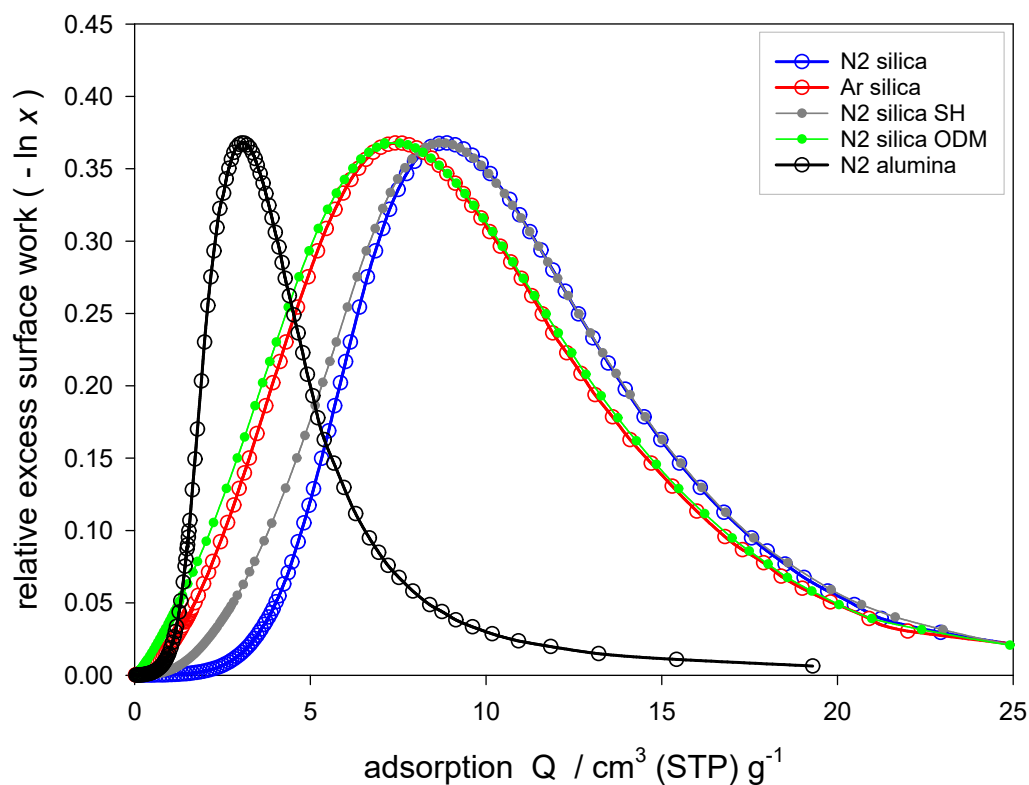

Figure S18: Monolayer detection by excess surface work (ESW).  $Q_{ESW}$  in  $\text{cm}^3 \text{g}^{-1}$ :  
 $\text{N}_2$  silica:  $8.944 \pm 0.007$ , Ar silica:  $7.5872 \pm 0.0008$ ,  $\text{N}_2$  silica SH:  $8.832 \pm 0.005$ ,  $\text{N}_2$  silica ODM:  
 $7.532 \pm 0.006$ ,  $\text{N}_2$  alumina:  $3.114 \pm 0.004$

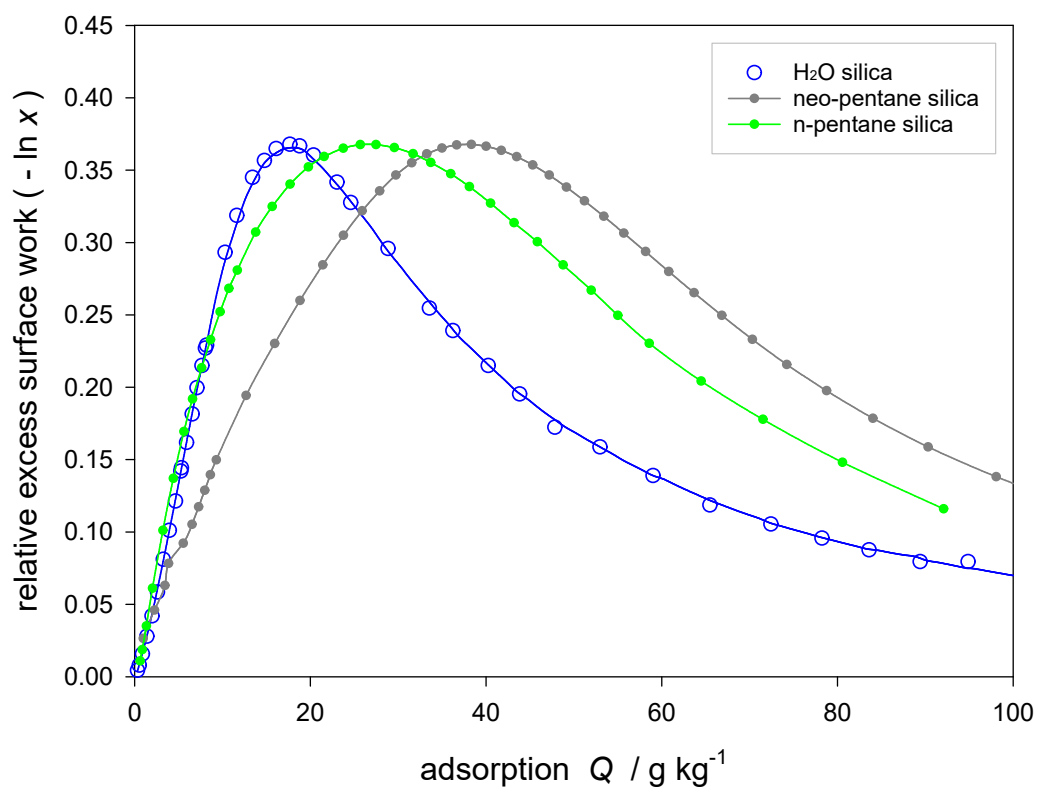

Figure S19: Monolayer detection by excess surface work (ESW).  $Q_{BET}$  in  $\text{g kg}^{-1}$ :  
 water silica:  $18.5 \pm 0.1$ , neo-pentane silica:  $38.77 \pm 0.06$ , n-pentane silica:  $27.7 \pm 0.2$

## Program in R for nonlinear regression with the 2-dimensional general cluster sorption isotherm, version for type II isotherms

In addition to the programs in R for the 1-dimensional GCSI to be found in the supporting information of ref. [13], the program for the 2-dimensional GCSI is appended in the present SI. It yields the results  $E_1 = \ln K_1, K, a, b, Q_1$ , and  $\beta$ . For data input an excel file due to the following example has to be used:

| rel pressure | adsorbed | estimated | parameters |
|--------------|----------|-----------|------------|
| 5.55E-07     | 0.109    | K1        | 150000     |
| 1.23E-06     | 0.210    | K         | 0.95       |
| 2.38E-06     | 0.310    | a         | -0.18      |
| 4.18E-06     | 0.420    | b         | -0.055     |
| 6.74E-06     | 0.520    | Q1        | 0.65       |
| 1.02E-05     | 0.620    |           |            |
| 1.49E-05     | 0.730    |           |            |
| 2.10E-05     | 0.830    |           |            |
| ect.         | ect.     |           |            |

Note: compared to the equations in the article the sign of  $a$  and  $b$  is inverted! Estimated start parameters are the starting values for non-linear regression. It is indicated within the running program if the limits of the parameters are reached. In that case the limits and perhaps some steps in the program have to be changed. The series of expansion (theoretically up to infinite) is terminated at  $\beta = 1000$ .

The program appends the results into the input file as new excel sheets concerning the calculated isotherm, calculated values of  $K_n$  and  $C_n$  ( $1 \leq n \leq 1000$ ), and the optimized parameters including the correlation coefficient  $R$ , the value of the corrected Akaike information criterion  $AICc$  [13] and the calculated monolayer adsorption in the dimension used for  $Q_1$  in the input file.
